# Supplementary material for: A glomerulus and proximal tubule microphysiological system simulating renal filtration, reabsorption, secretion, and toxicity
Source: Royal Society of Chemistry journal article supplement (doi:10.1039/d2lc00887d), 2022-12-14
Supplement: d2lc00887d1.pdf [file d2lc00887d1.pdf]

## Supplementary Figures and Tables

### A glomerulus and proximal tubule microphysiological system simulating renal filtration, reabsorption, secretion, and toxicity

Stephanie Y. Zhang and Gretchen J. Mahler\*

Department of Biomedical Engineering, The State University of New York at Binghamton, NY, USA; [szhan152@binghamton.edu](mailto:szhan152@binghamton.edu) (S.Z.), [gmahler@binghamton.edu](mailto:gmahler@binghamton.edu) (G.M.)\*

\*Corresponding author

**Table S1.** CIHP-1 ECM Attachment Statistical Analysis.

| ECM Conditions       | Collagen I (Col I) | Collagen IV (Col IV) | Laminin (Lam) | Heparan Sulfate (HS) | Col I, Lam, Col I | Col I, HS, Col I | Col IV, Lam, Col IV | Col IV, HS, Col IV |
|----------------------|--------------------|----------------------|---------------|----------------------|-------------------|------------------|---------------------|--------------------|
| Collagen I (Col I)   | -                  | p=0.03 (*)           | p=0.006 (**)  | p=0.02 (*)           | p=0.02 (*)        | p>0.99           | p=0.86              | p>0.99             |
| Collagen IV (Col IV) | p=0.03 (*)         | -                    | p<0.001 (***) | p>0.99               | p<0.001 (***)     | p=0.004 (**)     | p=0.57              | p=0.08             |
| Laminin (Lam)        | p=0.006 (**)       | p<0.001 (***)        | -             | p<0.001 (***)        | p>0.99            | p=0.03 (*)       | p<0.001 (***)       | p=0.006 (**)       |
| Heparan Sulfate (HS) | p=0.02 (*)         | p>0.99               | p<0.001 (***) | -                    | p<0.001 (***)     | p=0.004 (**)     | p=0.3               | p=0.04 (*)         |
| Col I, Lam, Col I    | p=0.02 (*)         | p<0.001 (***)        | p>0.99        | p<0.001 (***)        | -                 | p=0.07           | p<0.001 (***)       | p=0.02 (*)         |
| Col I, HS, Col I     | p>0.99             | p=0.004 (**)         | p=0.03 (*)    | p=0.004 (**)         | p=0.07            | -                | p=0.46              | p>0.99             |
| Col IV, Lam, Col IV  | p=0.86             | p=0.57               | p<0.001 (***) | p=0.3                | p<0.001 (***)     | p=0.46           | -                   | p=0.95             |
| Col IV, HS, Col IV   | p>0.99             | p=0.08               | p=0.006 (**)  | p=0.04 (*)           | p=0.02 (*)        | p>0.99           | p=0.95              | -                  |

**Table S2.** HUVECs ECM Attachment Statistical Analysis.

| ECM Conditions       | Collagen I (Col I) | Collagen IV (Col IV) | Laminin (Lam) | Heparan Sulfate (HS) | Col I, Lam, Col I | Col I, HS, Col I | Col IV, Lam, Col IV | Col IV, HS, Col IV |
|----------------------|--------------------|----------------------|---------------|----------------------|-------------------|------------------|---------------------|--------------------|
| Collagen I (Col I)   | -                  | p<0.001 (***)        | p=0.28        | p=0.71               | p<0.001 (***)     | p=0.76           | p<0.001 (***)       | p>0.99             |
| Collagen IV (Col IV) | p>0.99             | -                    | p=0.02        | p=0.14               | p<0.001 (***)     | p=0.001 (**)     | p=0.98              | p=0.04 (*)         |
| Laminin (Lam)        | p=0.28             | p=0.02               | -             | p>0.99               | p<0.001 (***)     | p=0.96           | p=0.14              | p=0.88             |
| Heparan Sulfate (HS) | p=0.71             | p=0.14               | p>0.99        | -                    | p<0.001 (***)     | p>0.99           | p=0.42              | p=0.95             |
| Col I, Lam, Col I    | p<0.001 (***)      | p<0.001 (***)        | p<0.001 (***) | p<0.001 (***)        | -                 | p<0.001 (***)    | p<0.001 (***)       | p<0.001 (***)      |
| Col I, HS, Col I     | p=0.76             | p=0.001 (**)         | p=0.96        | p>0.99               | p<0.001 (***)     | -                | p=0.009 (**)        | p>0.99             |
| Col IV, Lam, Col IV  | p<0.001 (***)      | p=0.98               | p=0.14        | p=0.42               | p<0.001 (***)     | p=0.009 (**)     | -                   | p=0.12             |
| Col IV, HS, Col IV   | p>0.99             | p=0.04 (*)           | p=0.88        | p=0.95               | p<0.001 (***)     | p>0.99           | p=0.12              | -                  |

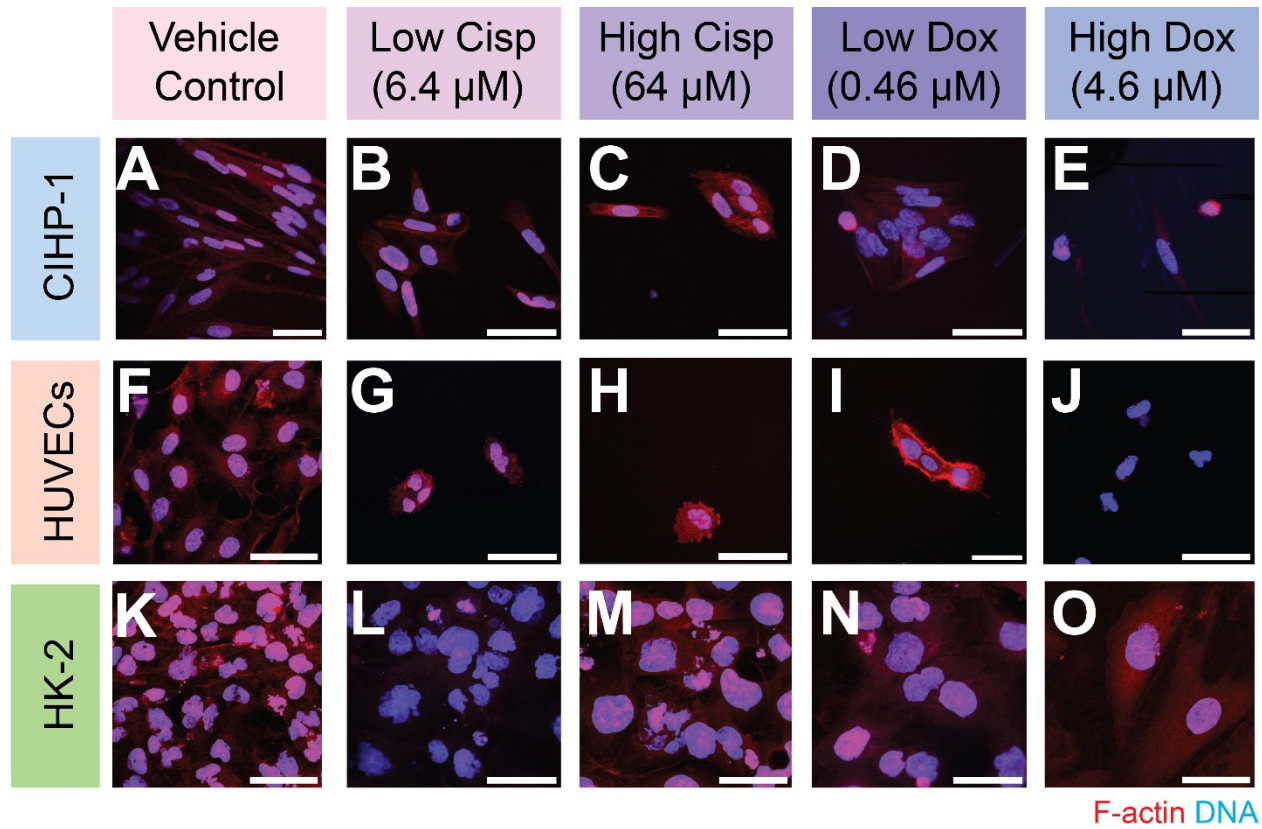

Fig. S1 **7-Day Static Drug-Induced Tri-culture Attachment Test.** (A-E) Images of CIHP-1 with all drug conditions. (F-J) Images of HUVECs with all drug conditions. (K-O) Images of HK-2 with all drug conditions. Red= F-actin and blue = DNA. Scalebar = 50  $\mu$ m.

**A**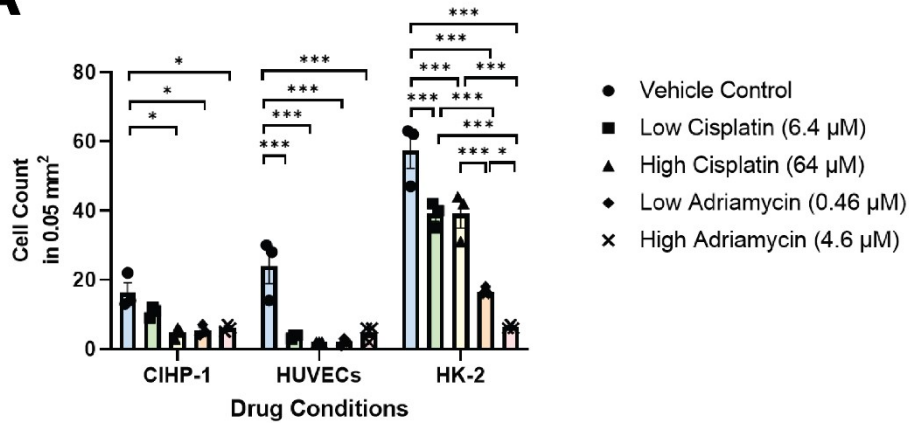**B**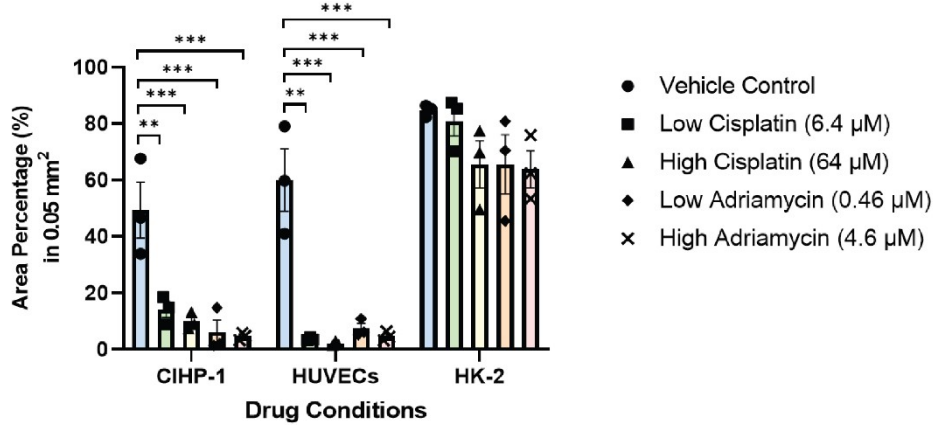

**Fig. S2 7-Day Static Nephrotoxicity Image Analysis (n=3 MPS per condition).** (A) Cell count of all cell types with all drug conditions. (Comparison of cell count of each cell type with each drug condition, \*\*\* p<0.001, \*\* p<0.01, \* p<0.05 ordinary two-way ANOVA, Tukey's test). (B) Area percentage of all cell types with all drug conditions. (Comparison of confluence of each cell type with each drug condition, \*\*\* p<0.001, \*\* p<0.01, \* p<0.05 ordinary two-way ANOVA, Tukey's test).

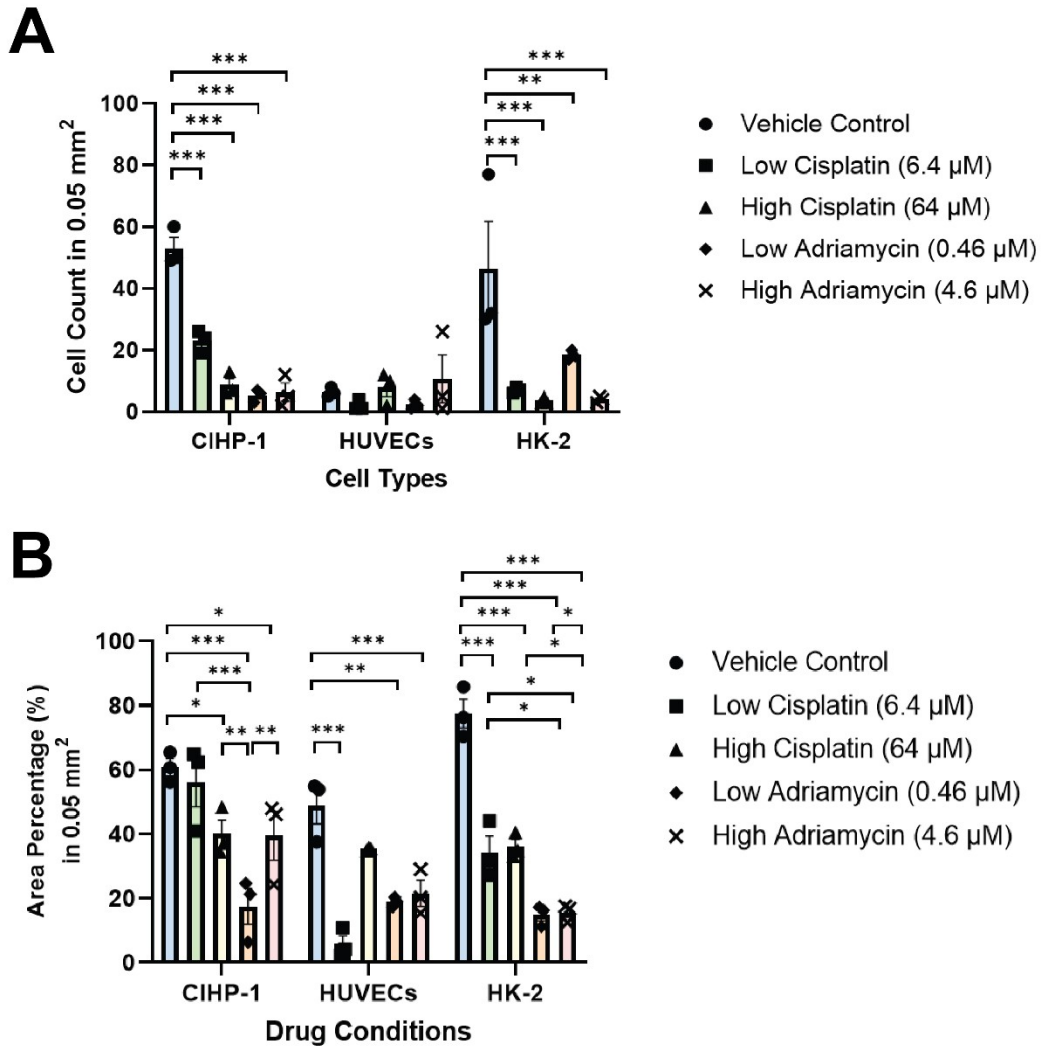

Fig. S3 7-Day Dynamic Nephrotoxicity Image Analysis (n=3 MPS per condition). (A) Cell count of all cell types with all drug conditions. (Comparison of cell count with each cell type, \*\*\* p<0.001, \*\* p<0.01, ordinary two-way ANOVA, Tukey's test). (B) Area percentage of all cell types with all drug conditions (Comparison of area percentage with each cell type, \*\*\* p<0.001, \*\* p<0.01, \* p<0.05, ordinary two-way ANOVA, Tukey's test).

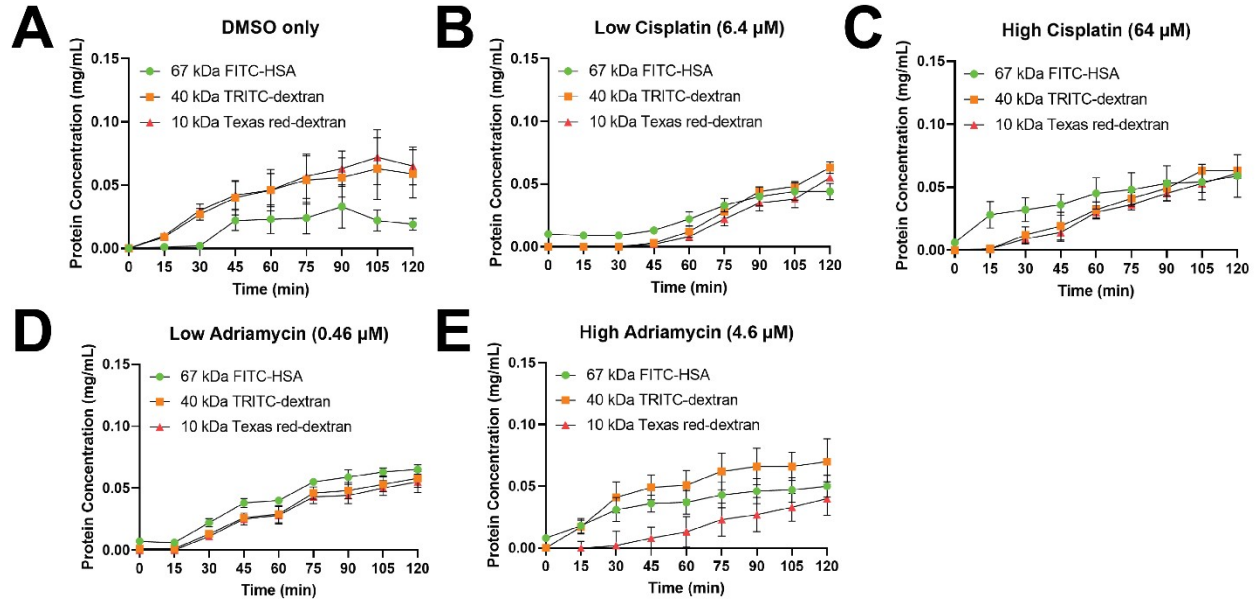

Fig. S4 **Protein and Dextran Filtration (n=3 microphysiological system [MPS] devices/condition)**. (A) Filtrate output of FITC-HSA, Texas red, and TRITC in 1% DMSO Condition. (B) Filtrate output of FITC-HSA, Texas red, and TRITC in 6.4  $\mu$ M of cisplatin. (C) Filtrate output of FITC-HSA, Texas red, and TRITC in 64  $\mu$ M of cisplatin. (D) Filtrate output of FITC-HSA, Texas red, and TRITC in 0.46  $\mu$ M of adriamycin.

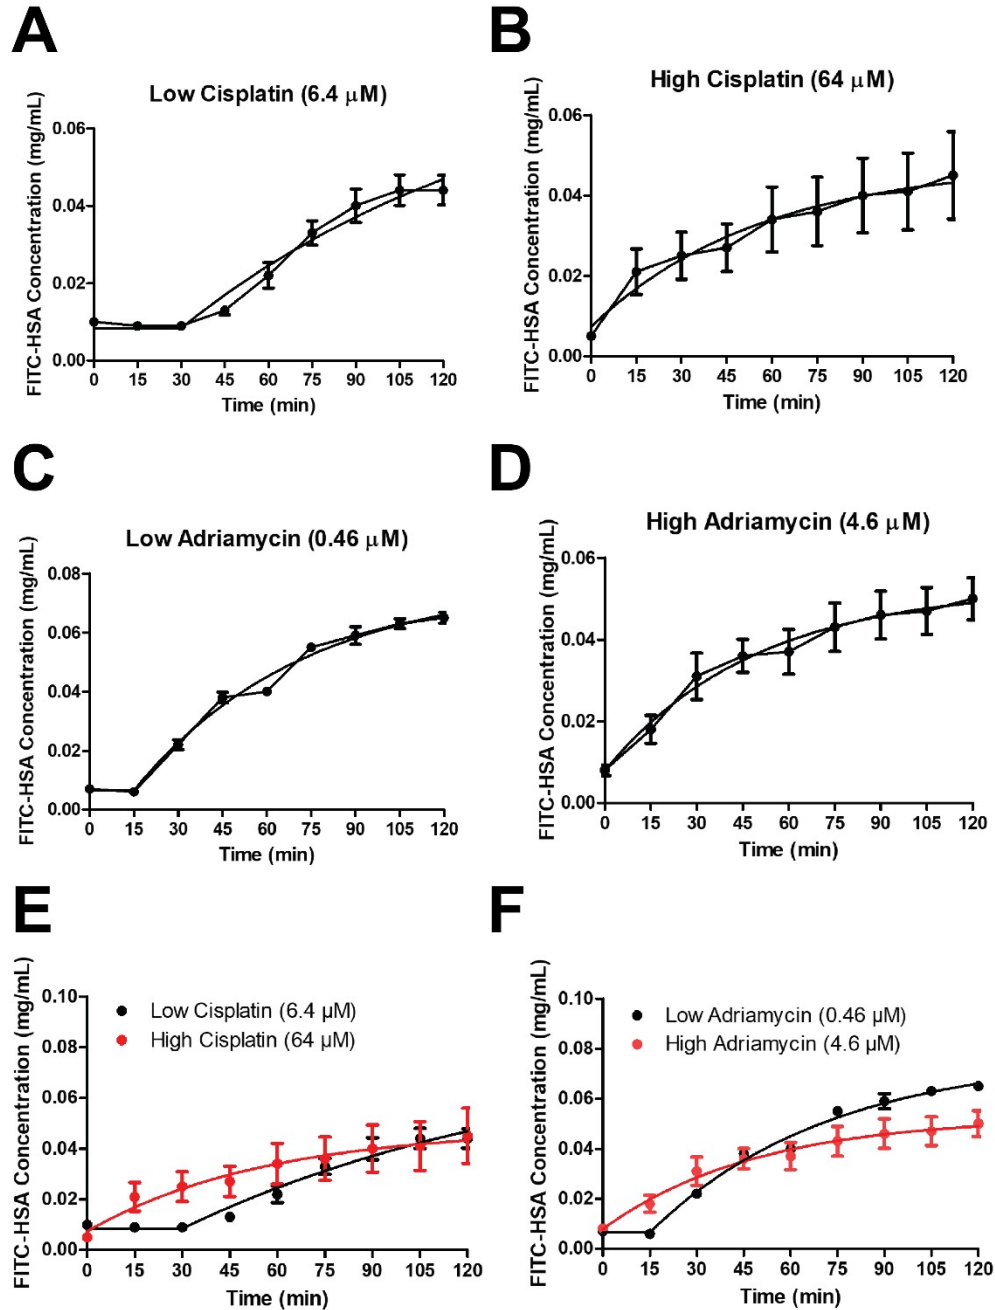

**Fig. S5 Curve Fit Model of Serum Albumin Filtration for Drug Conditions.** (A) Filtrate output of FITC-HSA only in low cisplatin (6.4  $\mu\text{M}$ ). (Nonlinear regression:  $y = 8.4 \times 10^{-3} + (7.29 \times 10^{-2}) \times (1 - \exp(-8.3 \times 10^{-3} \times (t - 30)))$ ,  $R^2 = 0.9063$ ) (B) Filtrate output of FITC-HSA only in high cisplatin (64  $\mu\text{M}$ ). (Nonlinear regression:  $y = 7.3 \times 10^{-3} + (4.08 \times 10^{-2}) \times (1 - \exp(-1.7 \times 10^{-2} \times t))$ ,  $R^2 = 0.5193$ ). (C) Filtrate output of FITC-HSA only in low adriamycin (0.46  $\mu\text{M}$ ). (Nonlinear regression:  $y = 6.42 \times 10^{-3} + (7.75 \times 10^{-2}) \times (1 - \exp(-1.7 \times 10^{-2} \times (t - 15)))$ ,  $R^2 = 0.9743$ ). (D) Filtrate output of FITC-HSA only in high adriamycin (4.6  $\mu\text{M}$ ). (Nonlinear regression:

$y = 7.8 \times 10^{-3} + (4.51 \times 10^{-2}) \times (1 - \exp(-2.0 \times 10^{-2} \times t))$ ,  $R^2 = 0.7736$ ). (E) Comparison of FITC-HSA output in low and high cisplatin. (F) Comparison of FITC-HSA output in low and high adriamycin.
